# Supplementary material
Source: Springer Nature journal article supplement (https://www.springermedizin.de/resource/supplementary/12978_2012_173_MOESM2_ESM.pdf/9602188)
Supplement: MOESM2 [file 9602188]

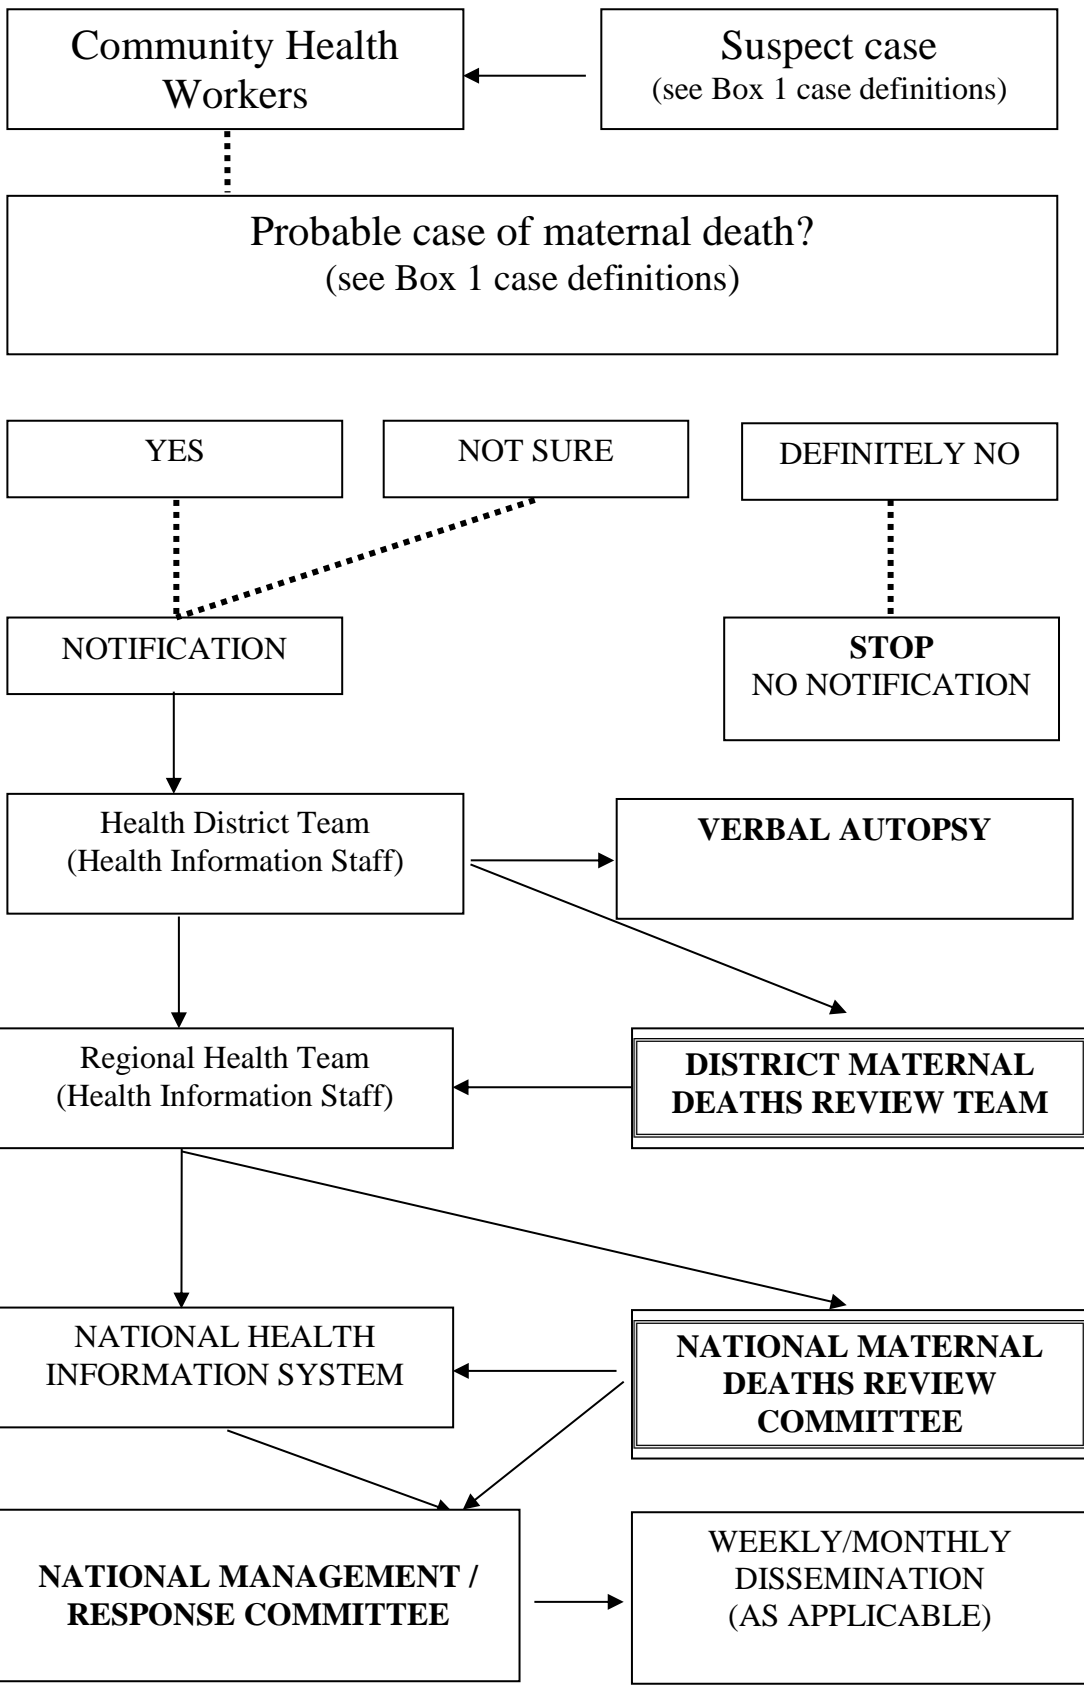

Community Health Workers

Suspect case  
(see Box 1 case definitions)

Probable case of maternal death?  
(see Box 1 case definitions)

YES

NOT SURE

DEFINITELY NO

NOTIFICATION

**STOP**  
NO NOTIFICATION

Health District Team  
(Health Information Staff)

**VERBAL AUTOPSY**

Regional Health Team  
(Health Information Staff)

**DISTRICT MATERNAL DEATHS REVIEW TEAM**

NATIONAL HEALTH INFORMATION SYSTEM

**NATIONAL MATERNAL DEATHS REVIEW COMMITTEE**

**NATIONAL MANAGEMENT / RESPONSE COMMITTEE**

WEEKLY/MONTHLY DISSEMINATION  
(AS APPLICABLE)
